# Supplementary material
Source: Springer Nature journal article supplement (https://www.springermedizin.de/resource/supplementary/13014_2013_1224_MOESM4_ESM.pdf/9635184)

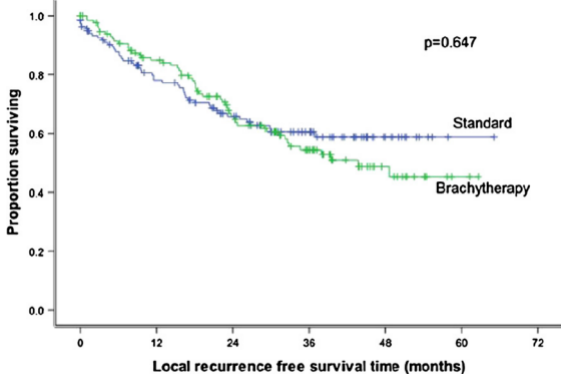

|               |     |     |    |    |    |   |   |
|---------------|-----|-----|----|----|----|---|---|
| Standard      | 139 | 93  | 67 | 41 | 12 | 1 | 0 |
| Brachytherapy | 134 | 100 | 66 | 40 | 14 | 2 | 0 |

Supplement: MOESM4 [file 9635184]
